# Supplementary material for: Arsenite oxidation regulator AioR regulates bacterial chemotaxis towards arsenite in Agrobacterium tumefaciens GW4
Source: PubMed Central journal article supplement (PMC5335332; doi:10.1038/srep43252), 2017-03-03
Supplement: srep43252-s1.pdf [file srep43252-s1.pdf]

1     **Arsenite oxidation regulator AioR regulates bacterial chemotaxis towards**  
2                     **arsenite in *Agrobacterium tumefaciens* GW4**

3  
4     Kaixiang Shi<sup>1</sup>, Xia Fan<sup>1</sup>, Zixu Qiao<sup>1</sup>, Yushan Han<sup>1</sup>, Timothy R. McDermott<sup>2</sup>, Qian Wang<sup>1, 2\*</sup>,  
5                                     Gejiao Wang<sup>1\*</sup>

6  
7     <sup>1</sup> *State Key Laboratory of Agricultural Microbiology, College of Life Science and Technology,*  
8     *Huazhong Agricultural University, Wuhan 430070, China*

9  
10  
11    <sup>2</sup> *Department of Land Resources and Environmental Sciences, Montana State University,*  
12    *Bozeman, MT 59717, USA*

13  
14  
15    \* Corresponding authors:

16    Gejiao Wang, State Key Laboratory of Agricultural Microbiology, Huazhong Agricultural University, Wuhan  
17    430070, China. Phone: 86-27-87281261; E-mail: [gejiao@mail.hzau.edu.cn](mailto:gejiao@mail.hzau.edu.cn)

18  
19    Qian Wang, Dept. Land Resources and Environmental Sciences, Montana State University, Bozeman, MT  
20    59717, USA. Phone: 406-599-6873; E-mail: [qianwang@mail.hzau.edu.cn](mailto:qianwang@mail.hzau.edu.cn)

21  
22  
23  
24    Running title: AioR regulates chemotaxis towards As(III)

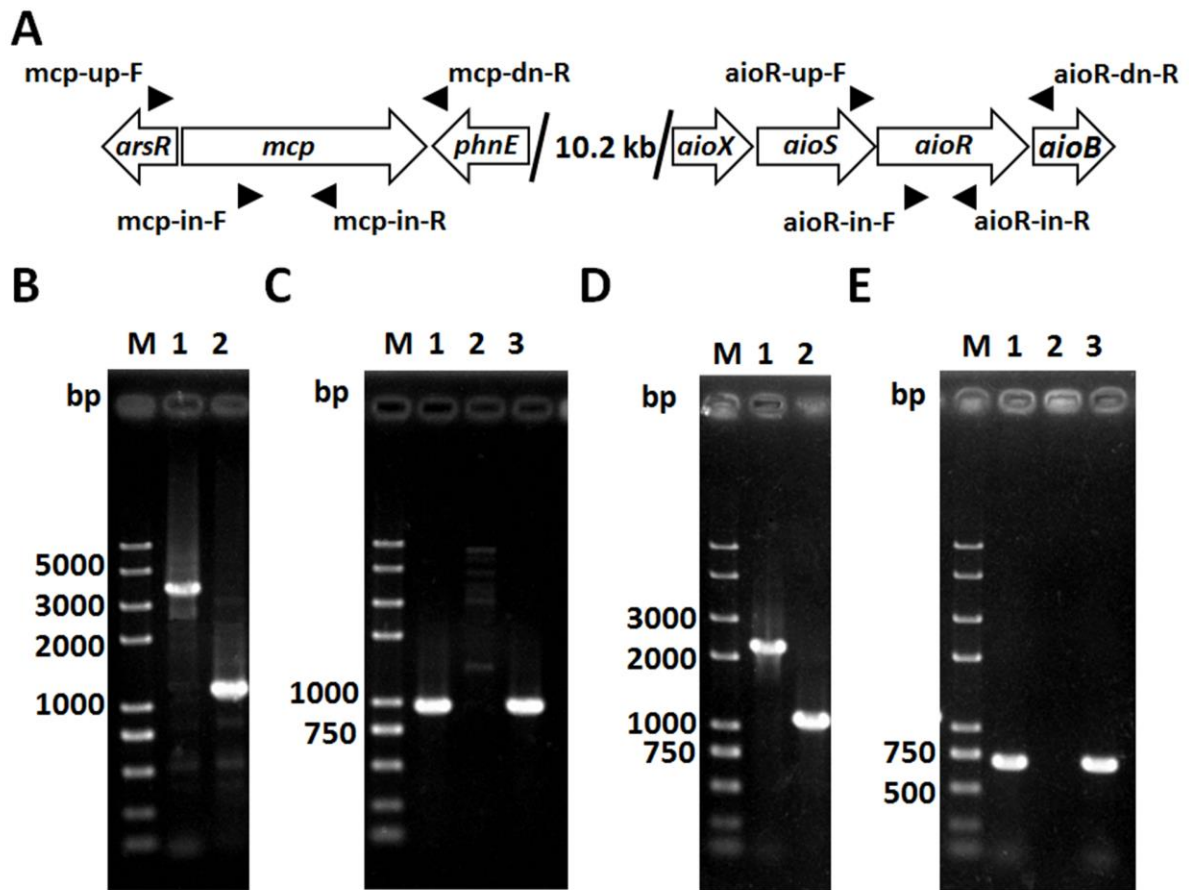

30

31 **Figure S1.** Full-length gels are presented in Supplementary Figure S4 (B-C) and Figure S5  
 32 (D-E). Diagnostic PCR confirming the mutant strains GW4- $\Delta$ *mcp* (B-C) and GW4- $\Delta$ *aioR*  
 33 (D-E) and their complementation strain GW4- $\Delta$ *mcp*-C (C) and GW4- $\Delta$ *aioR*-C (E). (A) The  
 34 physical map of *mcp* and *aioR* genes in *A. tumefaciens* GW4, and the primer locations used to  
 35 confirm the GW4- $\Delta$ *mcp*, GW4- $\Delta$ *mcp*-C, GW4- $\Delta$ *aioR* and GW4- $\Delta$ *aioR*-C. (B) PCR  
 36 amplicons using primers Mcp-up-F and Mcp-dn-R. (C) PCR amplicons using primers  
 37 Mcp-in-F and Mcp-in-R. (D) PCR amplicons using primers AioR-up-F and AioR-dn-R. (E)  
 38 PCR amplicons using primers AioR-in-F and AioR-in-R. For all panels: Lane 1, strain GW4,  
 39 lane 2, *mcp* or *aioR* mutant strain, and lane 3, the complemented strain GW4- $\Delta$ *mcp*-C or  
 40 GW4- $\Delta$ *aioR*-C. M, the molecular weight marker (DL 2000 plus). Amplicon identities were  
 41 confirmed by DNA sequencing.

42

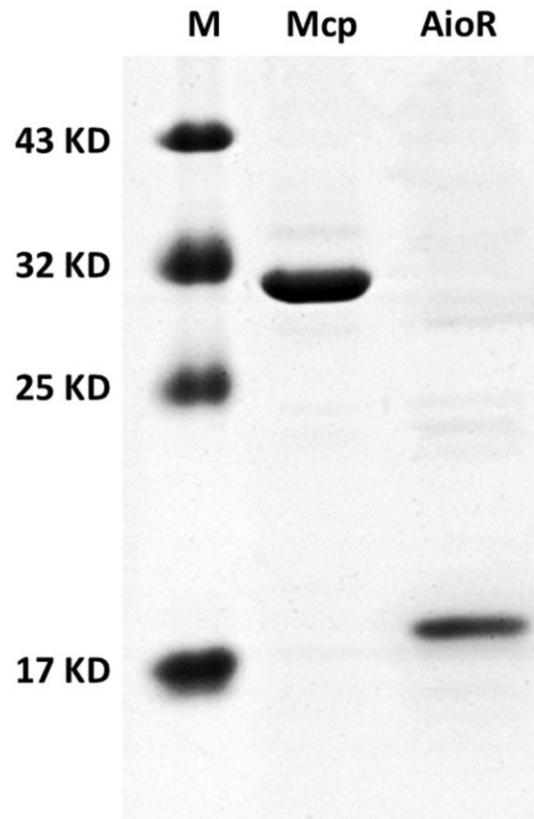

43

44 **Figure S2.** Over-expressed Mcp and AioR with a His<sub>6</sub> tag in *E. coli* BL21. The Mcp protein  
45 was purified from the 43 aa to 325 aa, which is the substrate binding domain predicted by  
46 Tmpred and CCTOP online software, without the transmembrane part. AioR protein was  
47 purified from the 318 aa to 442 aa, which is the DNA binding domain (HTH) predicted by  
48 Protein Blast online software.

49

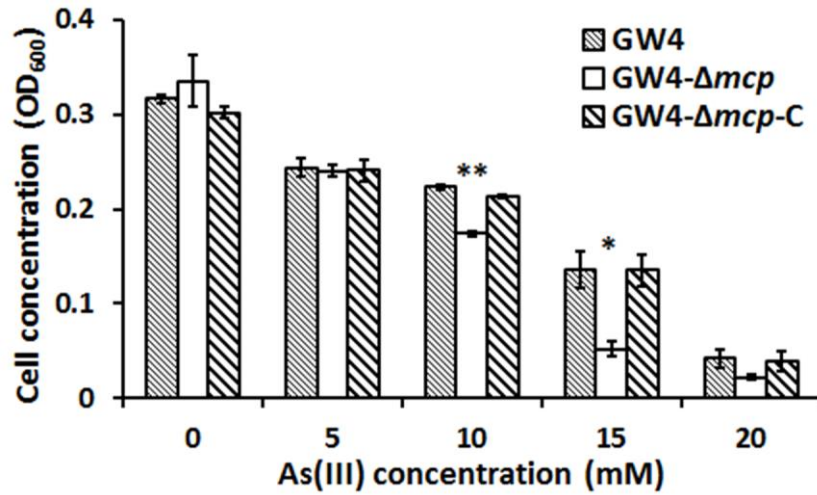

50

51 **Figure S3.** Effect of As(III) on bacterial growth in *A. tumefaciens* GW4. Data are shown as  
 52 the mean of three replicates, with the error bars illustrating one standard deviation. The  
 53 significance was represented by stars. \* means  $p < 0.05$ , while \*\* means  $p < 0.01$ .

54

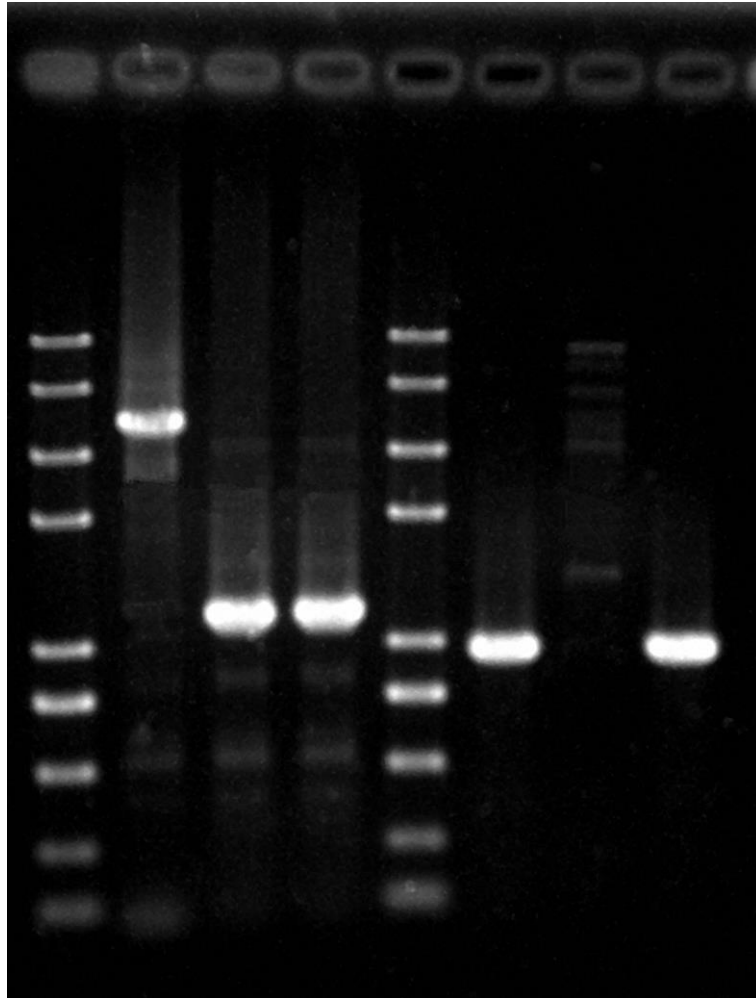

55

56 **Figure S4.** Full-length gel of diagnostic PCR confirming the mutant strains GW4- $\Delta mcp$  and  
57 complementation strain GW4- $\Delta mcp$ -C (**Figure S1 B-C**). Lane 3 and 4 were both *mcp* mutant  
58 strain, only lane 3 was presented. Amplicon identities were confirmed by DNA sequencing.

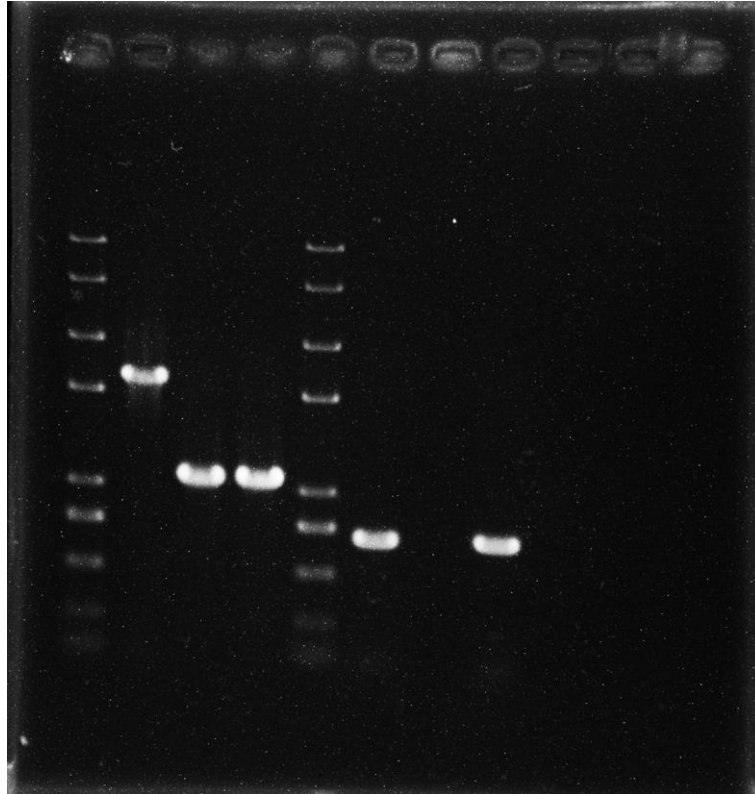

59

60 **Figure S5.** Full-length gel of diagnostic PCR confirming the mutant strains GW4- $\Delta$ *aioR* and  
61 complementation strain GW4- $\Delta$ *aioR*-C (**Figure S1 D-E**). Lane 3 and 4 were both *aioR*  
62 mutant strain, only lane 3 was presented. Amplicon identities were confirmed by DNA  
63 sequencing

64

65

66

67

68

69

70

71

**Table S1.** The strains and plasmids used in this research.

| Strain/plasmid                     | Relevant properties or derivation                                                                                                                                                                   | Source or reference |
|------------------------------------|-----------------------------------------------------------------------------------------------------------------------------------------------------------------------------------------------------|---------------------|
| <b>Strains</b>                     |                                                                                                                                                                                                     |                     |
| <i>Agrobacterium tumefaciens</i>   |                                                                                                                                                                                                     |                     |
| GW4                                | Wild type, As(III) oxidizing strain                                                                                                                                                                 | Reference 6         |
| GW4- $\Delta$ <i>aioR</i>          | <i>aioR</i> gene deleted                                                                                                                                                                            | This study          |
| GW4- $\Delta$ <i>aioR</i> -C       | Complementation of GW4- $\Delta$ <i>aioR</i>                                                                                                                                                        | This study          |
| GW4- $\Delta$ <i>mcp</i>           | <i>mcp</i> gene deleted                                                                                                                                                                             | This study          |
| GW4- $\Delta$ <i>mcp</i> -C        | Complementation of GW4- $\Delta$ <i>mcp</i>                                                                                                                                                         | This study          |
| GW4- $\Delta$ <i>aioA</i>          | <i>aioA</i> gene deleted                                                                                                                                                                            | Reference 15        |
| <i>Escherichia coli</i>            |                                                                                                                                                                                                     |                     |
| DH5 $\alpha$                       | <i>supE44 lacU169(<math>\phi</math>80<i>lacZ</i>M15) hRDR17 recA1 endA1 gyrA96 thi-1 relA1</i>                                                                                                      | Reference 37        |
| S17-1 $\lambda$ <i>pir</i>         | F <sup>-</sup> RP4-2-Tc::Mu <i>aphA</i> ::Tn7 <i>recA</i> $\lambda$ <i>pir</i> lysogen; Sm <sup>R</sup> Tp <sup>R</sup>                                                                             | This study          |
| BL21Star <sup>TM</sup> (DE3) pLysS | F <sup>-</sup> <i>ompT hsdSB (r<sub>B</sub><sup>-</sup> m<sub>B</sub><sup>-</sup>) gal dcm me131 (DE3) pLysS (Cm<sup>R</sup>)</i>                                                                   | Invitrogen          |
| XL1-Blue                           | $\Delta$ ( <i>mcrA</i> )183 $\Delta$ ( <i>mcrCB</i> - <i>hsdSMR</i> - <i>mrr</i> )173 <i>endA1 supE44 thi-1 recA1 gyrA96 relA1 lac</i> [F <sup>'</sup> <i>proAB lacIqZAM15 Tn5 Km<sup>r</sup></i> ] | Stratagene          |
| <b>Plasmids</b>                    |                                                                                                                                                                                                     |                     |
| pJQ200SK                           | <i>sacB sac<sup>R</sup> Suc<sup>S</sup>; Gen<sup>R</sup></i>                                                                                                                                        | Reference 38        |
| pJQ- <i>aioR</i>                   | Gene mutation plasmid to create GW4- $\Delta$ <i>aioR</i> ; <i>sacB sac<sup>R</sup> Suc<sup>S</sup>; Gen<sup>R</sup></i>                                                                            | This study          |
| pJQ- <i>mcp</i>                    | Gene mutation plasmid to create GW4- $\Delta$ <i>mcp</i> ; <i>sacB sac<sup>R</sup> Suc<sup>S</sup>; Gen<sup>R</sup></i>                                                                             | This study          |
| pCT-Zori                           | <i>oriT</i> broad host range; Cm <sup>R</sup>                                                                                                                                                       | Lab stock           |
| pCT-Zori- <i>aioR</i>              | <i>aioR</i> gene cloned into pCT-Zori; Cm <sup>R</sup>                                                                                                                                              | This study          |
| pCT-Zori- <i>mcp</i>               | <i>mcp</i> gene cloned into pCT-Zori; Cm <sup>R</sup>                                                                                                                                               | This study          |
| pET-28(a+)                         | Km <sup>R</sup> , His6 Tag expression vector                                                                                                                                                        | Novagen             |
| pET-28a- <i>aioR</i>               | <i>aioR</i> in frame fusion to the multiple sites of pET-28(a+)                                                                                                                                     | This study          |
| pET-28a- <i>mcp</i>                | <i>mcp</i> in frame fusion to the multiple sites of pET-28(a+)                                                                                                                                      | This study          |
| pLSP-KT2 <i>lacZ</i>               | Km <sup>R</sup> , <i>oriV</i> , <i>lacZ</i> -fusion vector used for <i>lacZ</i> fusion constructs                                                                                                   | Invitrogen          |
| pLSP- <i>aioBA</i>                 | pLSP-KT2 <i>lacZ</i> containing <i>aioBA</i> promoter                                                                                                                                               | This study          |
| pLSP- <i>mcp</i>                   | pLSP-KT2 <i>lacZ</i> containing <i>mcp</i> promoter                                                                                                                                                 | This study          |
| pTRG                               | Tet <sup>R</sup> , for bacterial one-hybrid assay                                                                                                                                                   | Stratagene          |
| pTRG-AioR                          | pTRG containing AioR coding region                                                                                                                                                                  | This study          |
| pBXcmT                             | Cm <sup>R</sup> , for bacterial one-hybrid assay                                                                                                                                                    | Reference 23        |
| pBX-P <i>mcp</i>                   | pBXcmT containing <i>mcp</i> promoter                                                                                                                                                               | This study          |

**Table S2.** Primers used in this research.

| Primer pair                 | Primer sequence                                                                                         | Use                                                                          |
|-----------------------------|---------------------------------------------------------------------------------------------------------|------------------------------------------------------------------------------|
| AioR-up-F/<br>AioR-up-R     | 5'AAAGGATCCAACACCAGCCTGTCCCTTCT3/<br>5' <u>GAGCTCGCGCATGGCCTGCTCTCCCTTCGT</u><br>CCACCATTGGA3'          | Crossover PCR to<br>create <i>aioR</i> mutant                                |
| AioR-dn-F/<br>AioR-dn-R     | 5' <u>GAGCAGGCCATGCGCGAGCTCGCATTTC</u><br>CGCACGACACTC3'/<br>5' <u>AAATCTAGAAACCTGCTGGCCTCCCTTTT</u> 3' | Crossover PCR to<br>create <i>aioR</i> mutant                                |
| Mcp-up-F/<br>Mcp-up-R       | 5'AAAGGGCCCCAGAACAGCCGCTTGAGG3'/<br>5' <u>TTCGAAAATGGAATGAGCGGCTGATTTGCG</u><br>TAGTTC3'                | Crossover PCR to<br>create <i>mcp</i> mutant                                 |
| Mcp-dn-F/<br>Mcp-dn-R       | 5' <u>GCTCATTCCATTTTCGAAGAATGAGGCGTG</u><br>GGAAGA3'/<br>5' <u>AAAACCTAGTGGTTACCTTGGGCTATGC</u> 3'      | Crossover PCR to<br>create <i>mcp</i> mutant                                 |
| AioR-C-F/<br>AioR-C-R       | 5'AAAGTCGACCGTTCAGAGTGGTGATG3'/<br>5' <u>AAAAGCTTTCGCCGCCGTTGTT</u> 3'                                  | Complementation<br>for <i>aioR</i> mutant                                    |
| Mcp-C-F/<br>Mcp-C-R         | 5'AAAGAGCTCGCATAACGGAAAGCACA3'/<br>5' <u>AAATCTAGATCCGCTTTCTGCTTCT</u> 3'                               | Complementation<br>for <i>mcp</i> mutant                                     |
| AioR-in-F/<br>AioR-in-R     | 5'CCCTTCATCGCCGTAAACTG3'/<br>5'CTGCTGCCTGGGAAATCTGT3'                                                   | Confirm for<br>GW4- $\Delta$ <i>aioR</i> and<br>GW4- $\Delta$ <i>aioR</i> -C |
| Mcp-in-F/<br>Mcp-in-R       | 5'AAGCGGGACTGTCTATGT3'/<br>5'AATGTGGCAAGCGTCT3'                                                         | Confirm for<br>GW4- $\Delta$ <i>mcp</i> and<br>GW4- $\Delta$ <i>mcp</i> -C   |
| AioR-HTH-F/<br>AioR-HTH-R   | 5'AAAGAATTTCGAGGAGATCATGCAGATCAGGG<br>3'/5' <u>AAAGCGGCCGCAGTTGCCCGTTCGCTTTT</u> 3'                     | Over-expression of<br><i>AioR</i>                                            |
| Mcp-As-F/<br>Mcp-As-R       | 5'AAAGAATTCATGTATTGGCAAGAAGTTGGA3'/<br>5' <u>AAAAGCTTTTACCGATGCATTGGTCCGAG</u> 3'                       | Over-expression of<br><i>Mcp</i>                                             |
| AioR-lacZ-F/<br>AioR-lacZ-R | 5'AAAGAATTCGCATTTACGCACGAC3'/<br>5' <u>AAAGGATCCGCCAGAAACGGCGACA</u> 3'                                 | Cloning of <i>aioBA</i><br>promoter for reporter<br>gene                     |
| Mcp-lacZ-F/<br>Mcp-lacZ-R   | 5'AAAGAATTCACGCATAACGGAAAGCACA3'/<br>5' <u>AAAGGATCCGGCTGATTTGCGTAGTTTC</u> 3'                          | Cloning of <i>mcp</i><br>promoter for reporter<br>gene                       |
| 16S-RT-F/<br>16S-RT-R       | 5'GGTATGGGCATTGGAGACGA3'/<br>5'GGCAACTAAGGGCGAGGG3'                                                     | qRT-PCR for <i>16S</i>                                                       |
| CheA-RT-F/<br>CheA-RT-R     | 5'ATGCGTCGCTTTATTCG3'/<br>5'GCTGCGGATACCCTCTT3'                                                         | qRT-PCR for <i>cheA</i>                                                      |



75

**Table S2.** Primers used in this research.

76

(Continued)

|                             |                                                                              |                                                               |
|-----------------------------|------------------------------------------------------------------------------|---------------------------------------------------------------|
| CheY2-RT-F/<br>CheY2-RT-R   | 5'CCCATCATCTCGTCATTTTC3'/<br>5'TTCTTGGTGGTCGGGTT3'                           | qRT-PCR for <i>cheY2</i>                                      |
| FliG-RT-F/<br>FliG-RT-R     | 5'AGGAACGGGTCTGATGG3'/<br>5'CGATGGTCTGCGGATG3'                               | qRT-PCR for <i>fliG</i>                                       |
| AioR-one-F/<br>AioR-one-R   | 5'AAAGCGGCCGCAATGCAGCGTGAAACAGGA<br>3'/ 5'AAAGAAATCCCGCCGTTGTTTCATTTGG3'     | Cloning of <i>aioR</i> for<br>bacterial one-hybrid            |
| Mcp-one-F/<br>Mcp-one-R     | 5'AAATCTAGAGCGATGCCTGGAAAGAAA3'/<br>5'CAAATGCTGGCTCCGATT3'                   | Cloning of <i>mcp</i><br>promoter for<br>bacterial one-hybrid |
| AioBA-Box-F/<br>AioBA-Box-R | 5'TTTCACGCACGACACTCT3'/<br>5'ATTGCTATGCCAATTCCTA3'                           | Cloning of <i>aioBA</i><br>promoter for EMSA                  |
| Mcp-Box-F/<br>Mcp-Box-R     | 5'TACGGAAAGCACAATACG3'/<br>5'CTGGGATCGCATAGTTAA3'                            | Cloning of <i>mcp</i><br>promoter for EMSA                    |
| Mcp-M-F/<br>Mcp-M-R         | 5'TTGCAGTTGTTCGGATTTCCGCTTATCATTG3'/<br>5'CGGAAATCCGACAACACTGCAAACTGGTTTCA3' | Create mutant <i>mcp</i><br>probe                             |

---

\* The bolded sequences denote the reverse complement sequences for the crossover PCR, while the underlined sequence denotes the restriction enzyme sites.

77

## 78 **References**

79 37. Hanahan, D. Studies on transformation of *Escherichia coli* with plasmids. *J. Mol. Biol.*

80 **166**, 557-80 (1983).

81 38. Quandt, J. & Hynes, M. F. Versatile suicide vectors which allow direct selection for gene

82 replacement in gram-negative bacteria. *Gene*. **127**, 15-21 (1993).

83
